# Supplementary material
Source: publisher figshare collection journal article supplement (https://gsajournals.figshare.com/articles/dataset/_/13641035)
Supplement: Supplementary file [file 1]

| Primer Number | Primer Name    | Sequence (5'-3')                                      | Description                                                                                                            |
|---------------|----------------|-------------------------------------------------------|------------------------------------------------------------------------------------------------------------------------|
| 7             | TC290-2        | TGCTCTTCGCGCTGGCAGACATACTGTCCCAC                      | CmYLCV-F forward primer, type IIS site is highlighted in turquoise and overhang is underlined                          |
| 24            | TC219:GFPKIN-2 | TCGTCTCCGTAATGTTAATGCTGCCTATACGGCAGTGAACCTG           | gRNA1-R reverse primer, type IIS site is highlighted in turquoise, gRNA spacer sequence green and overhang underlined  |
| 25            | TC220:GFPKIN-2 | TCGTCTCATTACCATTAAACGTTTTAGAGCTAGAAATAGC              | gRNA1-F reverse primer, type IIS site is highlighted in turquoise, gRNA spacer sequence green and overhang underlined  |
| 26            | TC221:GFPKIN-2 | TCGTCTCCATTGGTGTCCCTCTGCCTATACGGCAGTGAAC              | gRNA2-R reverse primer, type IIS site is highlighted in turquoise, gRNA spacer sequence green and overhang underlined  |
| 27            | TC222:GFPKIN-2 | TCGTCTCACAATGTCTGCTGTTTTAGAGCTAGAAATAGC               | gRNA2-F reverse primer, type IIS site is highlighted in turquoise, gRNA spacer sequence green and overhang underlined  |
| 12            | TC222-2        | TGCTCTTCTGACCTGCCTATACGGCAGTGAAC                      | 35Sterm-R reverse primer, type IIS site is highlighted in turquoise and overhang is underlined                         |
| 38            | Bael-LHA-F1    | CGCGTAGTCCTCGGTAGGCAAGCTTATTTAATTC                    | forward primer for the amplification of LHA flanked by 16bp of pMOD_C0000 for Gibson Assembly (blue)                   |
| 39            | Bael-LHA-R1    | GATTAGTCTTAACCTTGTCTGCAGG                             | reverse primer for the amplification of LHA flanked by 10bp of pMOD_C0000 for Gibson Assembly (blue)                   |
| 40            | Bael-GFP-F2    | AGACAAAGTTAAGACTAATCTTTTCTCTTTCTCA                    | forward primer for the amplification of GFP flanked by 10bp of pMOD_C0000 for Gibson Assembly (blue)                   |
| 41            | Bael-GFP-R2    | GTTAATGTTATCAAAGCTCATCATGTTT                          | reverse primer for the amplification of GFP flanked by 10bp of pMOD_C0000 for Gibson Assembly (blue)                   |
| 42            | Bael-RHA-F3    | TGAGCTTTGATAACATTAACTTACCATTAACTGTA                   | forward primer for the amplification of RHA flanked by 10bp of pMOD_C0000 for Gibson Assembly (blue)                   |
| 43            | Bael-RHA-R3    | TGACTTGAAGTACACTCCGCTCTAGAATTAGTTG                    | reverse primer for the amplification of LHA flanked by 17bp of pMOD_C0000 for Gibson Assembly (blue)                   |
| 173           | 17p-F          | TCGAGCTCGGTACCCACCCTACTTAAAAACCCTTTCG                 | forward primer for the amplification of Manes.17G095200 flanked by 15bp of pTRANS_220d for In-fusion cloning (blue)    |
| 174           | 17p-R          | ACGAATGGGATCCATGGTGACCTCTGGATTTCAGTACGAGG             | reverse primer for the amplification of Manes.17G095200 flanked by 15bp of TAL20 product for In-fusion cloning (blue)  |
| 175           | TAL20-F        | ATGGATCCCATTCGTCCGCGCACGCCAAG                         | forward primer for the amplification of TAL20. First 15bp are included in Manes.17G095200 for In-fusion cloning (blue) |
| 176           | TAL20-R        | GGCGCGCCGATCCCCCACTGAGGAAATAGCT                       | reverse primer for the amplification of TAL20 flanked by 15bp of pTRANS_220d for In-fusion cloning (blue)              |
| 171           | SWEET10a_g-F   | CTTCGCTACGCGCTTCTTCATTTACTTTATATGCTAACTACTGACAAATACTG | forward primer used for genotyping products of HDR (Figure 2)                                                          |
| 10            | SWEET10aPro-R  | CATAACCAAGAACACGTTAATGGTAATGTTAATG                    | reverse primer used for genotyping products of HDR (Figure 2)                                                          |
| 37            | Actin-F        | ACAGTGTCTGGATCGGAGGATC                                | forward primer for Actin RT-PCR, 28 cycles                                                                             |
| KV38          | Actin-R        | GAAGCACTTCCTGTGGACGATG                                | reverse primer for Actin RT-PCR, 28 cycles                                                                             |
| 200           | 10a_qPCR-F     | CTTACTGTGTACCTTATCTATGCCACAAAGAAG                     | forward primer for MeSWEET10a and MeSWEET10a-GFP RT-PCR, 30 cycles                                                     |
| 201           | 10a_qPCR-R     | GCCATGTGTAAGGAAAAGAGTTAAGATAGCG                       | reverse primer for MeSWEET10a RT-PCR, 30 cycles                                                                        |
| 172           | GFP-R2         | CCAGTGAAAAGTCTTCTCTTTACTGAATTCGGCCG                   | reverse primer for MeSWEET10a-GFP RT-PCR, 30 cycles                                                                    |
| 164           | GFP-R          | CGTTGTGGGAGTTGTAGTTGTA                                | reverse primer for MeSWEET10a-GFP genotyping lines 12 and 42 (Figure S2)                                               |
